# Supplementary material for: Integration of Genome and Chromatin Structure with Gene Expression Profiles To Predict c-MYC Recognition Site Binding and Function
Source: PLOS journal article supplement (doi:10.1371/journal.pcbi.0030063), 2007-04-04
Supplement: S2 (10.1371/journal.pcbi.0030063.s002) [file journal.pcbi.0030063.s002]

<?xml version="1.0"?>
<!-- DTD for the XMLBIF 0.3 format -->
<!DOCTYPE BIF [
	<!ELEMENT BIF ( NETWORK )*>
	      <!ATTLIST BIF VERSION CDATA #REQUIRED>
	<!ELEMENT NETWORK ( NAME, ( PROPERTY | VARIABLE | DEFINITION )* )>
	<!ELEMENT NAME (#PCDATA)>
	<!ELEMENT VARIABLE ( NAME, ( OUTCOME |  PROPERTY )* ) >
	      <!ATTLIST VARIABLE TYPE (nature|decision|utility) "nature">
	<!ELEMENT OUTCOME (#PCDATA)>
	<!ELEMENT DEFINITION ( FOR | GIVEN | TABLE | PROPERTY )* >
	<!ELEMENT FOR (#PCDATA)>
	<!ELEMENT GIVEN (#PCDATA)>
	<!ELEMENT TABLE (#PCDATA)>
	<!ELEMENT PROPERTY (#PCDATA)>
]>


<BIF VERSION="0.3">
<NETWORK>
<NAME>Occupancy-Test-sites-weka.filters.supervised.attribute.Discretize-Rfirst-last</NAME>
<VARIABLE TYPE="nature">
	<NAME>Binding</NAME>
	<OUTCOME>High</OUTCOME>
	<OUTCOME>Low</OUTCOME>
	<PROPERTY>position = (228,135)</PROPERTY>
</VARIABLE>
<VARIABLE TYPE="nature">
	<NAME>&lt;TSS_Ebox_distance&gt;</NAME>
	<OUTCOME>&apos;(-inf-7.488672]&apos;</OUTCOME>
	<OUTCOME>&apos;(7.488672-inf)&apos;</OUTCOME>
	<PROPERTY>position = (0,405)</PROPERTY>
</VARIABLE>
<VARIABLE TYPE="nature">
	<NAME>&lt;Nearest_CGI_Distance&gt;</NAME>
	<OUTCOME>&apos;(-inf-5.257374]&apos;</OUTCOME>
	<OUTCOME>&apos;(5.257374-inf)&apos;</OUTCOME>
	<PROPERTY>position = (228,270)</PROPERTY>
</VARIABLE>
<VARIABLE TYPE="nature">
	<NAME>&lt;Nearest_Hypomethylation_Distance&gt;</NAME>
	<OUTCOME>&apos;(-inf-5.324851]&apos;</OUTCOME>
	<OUTCOME>&apos;(5.324851-inf)&apos;</OUTCOME>
	<PROPERTY>position = (228,0)</PROPERTY>
</VARIABLE>
<VARIABLE TYPE="nature">
	<NAME>&lt;Conserve_score_within_6bp_Window&gt;</NAME>
	<OUTCOME>&apos;(-inf-0.331858]&apos;</OUTCOME>
	<OUTCOME>&apos;(0.331858-inf)&apos;</OUTCOME>
	<PROPERTY>position = (456,270)</PROPERTY>
</VARIABLE>
<VARIABLE TYPE="nature">
	<NAME>&lt;Nearest_Acetylation_Distance&gt;</NAME>
	<OUTCOME>&apos;(-inf-7.024038]&apos;</OUTCOME>
	<OUTCOME>&apos;(7.024038-inf)&apos;</OUTCOME>
	<PROPERTY>position = (456,405)</PROPERTY>
</VARIABLE>
<DEFINITION>
<FOR>Binding</FOR>
	<GIVEN>&lt;Nearest_Hypomethylation_Distance&gt;</GIVEN>
<TABLE>
0.7203389830508474 0.2796610169491525 
0.019736842105263157 0.9802631578947368 
</TABLE>
</DEFINITION>
<DEFINITION>
<FOR>&lt;TSS_Ebox_distance&gt;</FOR>
	<GIVEN>Binding</GIVEN>
	<GIVEN>&lt;Nearest_CGI_Distance&gt;</GIVEN>
<TABLE>
0.9651162790697675 0.03488372093023256 
0.75 0.25 
0.4166666666666667 0.5833333333333334 
0.6013513513513513 0.39864864864864863 
</TABLE>
</DEFINITION>
<DEFINITION>
<FOR>&lt;Nearest_CGI_Distance&gt;</FOR>
	<GIVEN>Binding</GIVEN>
<TABLE>
0.9659090909090909 0.03409090909090909 
0.19230769230769232 0.8076923076923077 
</TABLE>
</DEFINITION>
<DEFINITION>
<FOR>&lt;Nearest_Hypomethylation_Distance&gt;</FOR>
<TABLE>
0.43656716417910446 0.5634328358208955 
</TABLE>
</DEFINITION>
<DEFINITION>
<FOR>&lt;Conserve_score_within_6bp_Window&gt;</FOR>
	<GIVEN>Binding</GIVEN>
<TABLE>
0.375 0.625 
0.8186813186813187 0.1813186813186813 
</TABLE>
</DEFINITION>
<DEFINITION>
<FOR>&lt;Nearest_Acetylation_Distance&gt;</FOR>
	<GIVEN>Binding</GIVEN>
	<GIVEN>&lt;Nearest_CGI_Distance&gt;</GIVEN>
	<GIVEN>&lt;Conserve_score_within_6bp_Window&gt;</GIVEN>
<TABLE>
0.90625 0.09375 
0.8035714285714286 0.19642857142857142 
0.25 0.75 
0.5 0.5 
0.05 0.95 
0.2777777777777778 0.7222222222222222 
0.09848484848484848 0.9015151515151515 
0.16666666666666666 0.8333333333333334 
</TABLE>
</DEFINITION>
</NETWORK>
</BIF>
