# Supplementary material for: Integration of Genome and Chromatin Structure with Gene Expression Profiles To Predict c-MYC Recognition Site Binding and Function
Source: PLOS journal article supplement (doi:10.1371/journal.pcbi.0030063), 2007-04-04
Supplement: S4 (10.1371/journal.pcbi.0030063.s004) [file journal.pcbi.0030063.s004]

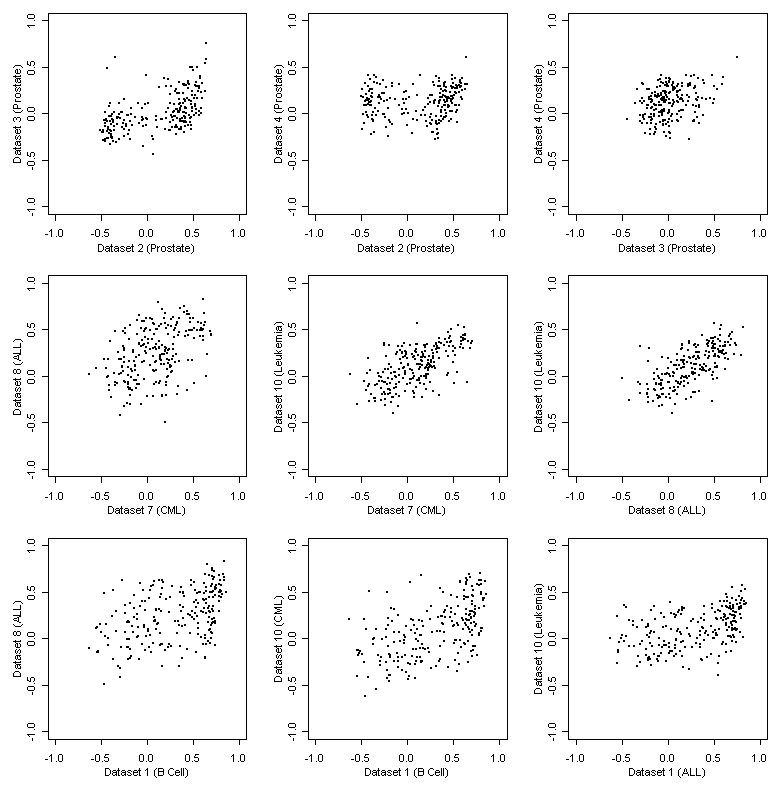


Figure S4

Figure S4 shows the comparison of correlation pattern of reported c-*MYC* target genes in same tissues. (X-axis: Pearson’s correlation coefficient from dataset A; Y-axis: Pearson’s correlation coefficient from dataset B)
